# Supplementary material for: A supramolecular approach to the selective detection of dopamine in the presence of ascorbate
Source: Royal Society of Chemistry journal article supplement (doi:10.1039/b407792j), 2004-01-01
Supplement: b407792j.pdf [file b407792j.pdf]

SUPPLEMENTARY INFORMATION

A supramolecular approach to the selective detection of dopamine in the presence of ascorbate

Alex Fragoso,<sup>a\*</sup> Eduardo Almirall,<sup>a</sup> Roberto Cao<sup>a</sup>, Luis Echegoyen<sup>b</sup> and Raúl González-Jonte<sup>c</sup>

<sup>a</sup>Laboratory of Bioinorganic Chemistry, Faculty of Chemistry, University of Havana, Havana 10400, Cuba; E-mail: [fragoso@fq.uh.cu](mailto:fragoso@fq.uh.cu).

<sup>b</sup>Department of Chemistry, Clemson University, Clemson, SC 29634, USA.

<sup>c</sup>Departamento de Química Física Aplicada, Universidad Autónoma de Madrid, Cantoblanco 28943, Spain.

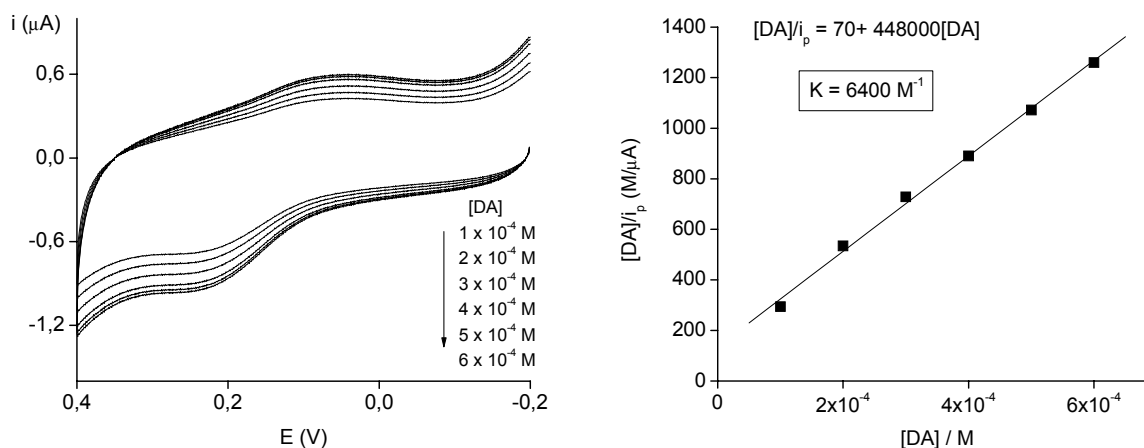

Fig. S1 CV recorded at different DA concentrations (left) and the corresponding Langmuir plot (right). Supporting electrolyte: phosphate buffer pH 7 (0.1 M), scan rate: 0.1 V/s.

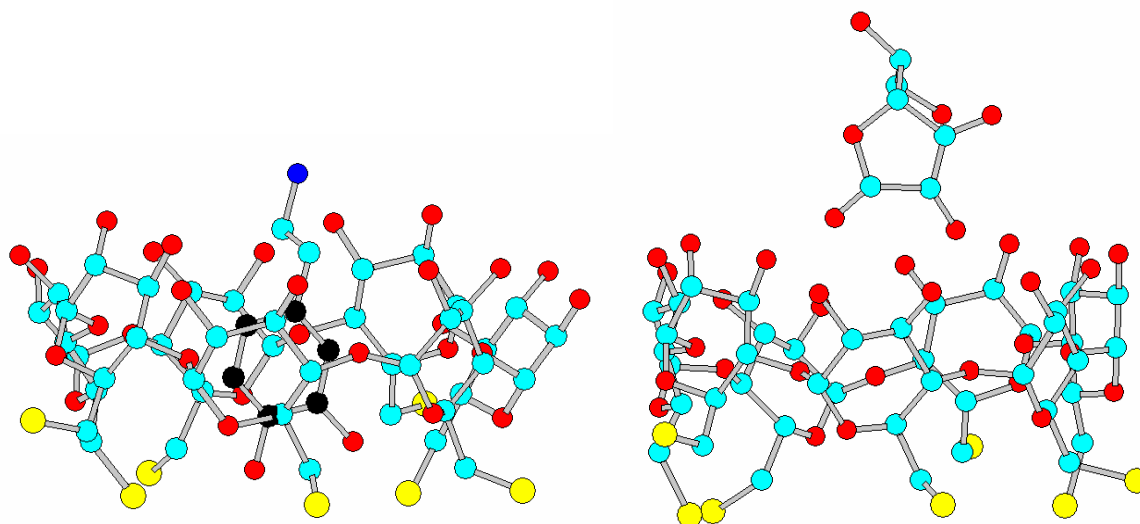

Fig. S2 Optimized geometries (AM1) obtained for the inclusion complexes of DA (left) and AA (right) in heptakis-6-thio-6-deoxy-bCD. The carbon atoms of DA have been highlighted in black and hydrogen atoms have been omitted for clarity. Atom colors are: C, cyan; O, red; N, blue; S, yellow.
